# Supplementary material for: Collaborative effects of chlorogenic acid and caffeine on lipid metabolismviathe AMPKα-LXRα/SREBP-1c pathway in high-fat diet-induced obese mice
Source: Royal Society of Chemistry journal article supplement (doi:10.1039/c9fo00502a), 2019-01-01
Supplement: c9fo00502a1.pdf [file c9fo00502a1.pdf]

Table S1. Composition of the diets (g/kg)

| Ingredient                | I    | II   | III  | IV     | V      | VI     | VII    | VIII   |
|---------------------------|------|------|------|--------|--------|--------|--------|--------|
| Corn starch               | 448  | 298  | 296  | 297.6  | 296.8  | 296.6  | 295.8  | 295.6  |
| Sucrose                   | 50   | 50   | 50   | 50     | 50     | 50     | 50     | 50     |
| Dextrin                   | 127  | 127  | 127  | 127    | 127    | 127    | 127    | 127    |
| DL-methionine             | 3    | 3    | 3    | 3      | 3      | 3      | 3      | 3      |
| Casein                    | 210  | 210  | 210  | 210    | 210    | 210    | 210    | 210    |
| Vitamin mix. <sup>1</sup> | 10   | 10   | 10   | 10     | 10     | 10     | 10     | 10     |
| Cellulose                 | 50   | 50   | 50   | 50     | 50     | 50     | 50     | 50     |
| Mineral mix. <sup>2</sup> | 30   | 30   | 30   | 30     | 30     | 30     | 30     | 30     |
| Choline bitartrate        | 2    | 2    | 2    | 2      | 2      | 2      | 2      | 2      |
| Corn oil                  | 70   | 70   | 70   | 70     | 70     | 70     | 70     | 70     |
| Beef tallow               | —    | 150  | 150  | 150    | 150    | 150    | 150    | 150    |
| Chlorogenic acid          | —    | —    | 2    | —      | 1      | 1      | 2      | 2      |
| Caffeine                  | —    | —    | —    | 0.4    | 0.2    | 0.4    | 0.2    | 0.4    |
| Energy (kcal/kg)          | 3982 | 4732 | 4724 | 4730.4 | 4727.2 | 4726.4 | 4723.2 | 4722.4 |

<sup>1,2</sup>: Vitamin mixture and mineral mixture were prepared according to AIN-76TM.

Energy from sucrose, corn starch, dextrin and casein was 4 kcal/g. Energy from corn oil and beef tallow was 9 kcal/g. Energy from cellulose was 0 kcal/g.

I : control; II : high fat diet (HFD); III: HFD + 0.2% Chlorogenic acid (CGA); IV: HFD + 0.04% caffeine; V: HFD + 0.1% CGA + 0.02% caffeine; VI: HFD + 0.1% CGA + 0.04% caffeine; VII: HFD + 0.2% CGA + 0.02% caffeine; VIII: HFD + 0.2% CGA + 0.04% caffeine.
